# Supplementary material for: Recent Increasing Incidence of Early-Stage Cervical Cancers of the Squamous Cell Carcinoma Subtype among Young Women
Source: PubMed Central journal article supplement (PMC7599510; doi:10.3390/ijerph17207401), 2020-10-12
Supplement: ijerph-17-07401-s001.pdf [file ijerph-17-07401-s001.pdf]

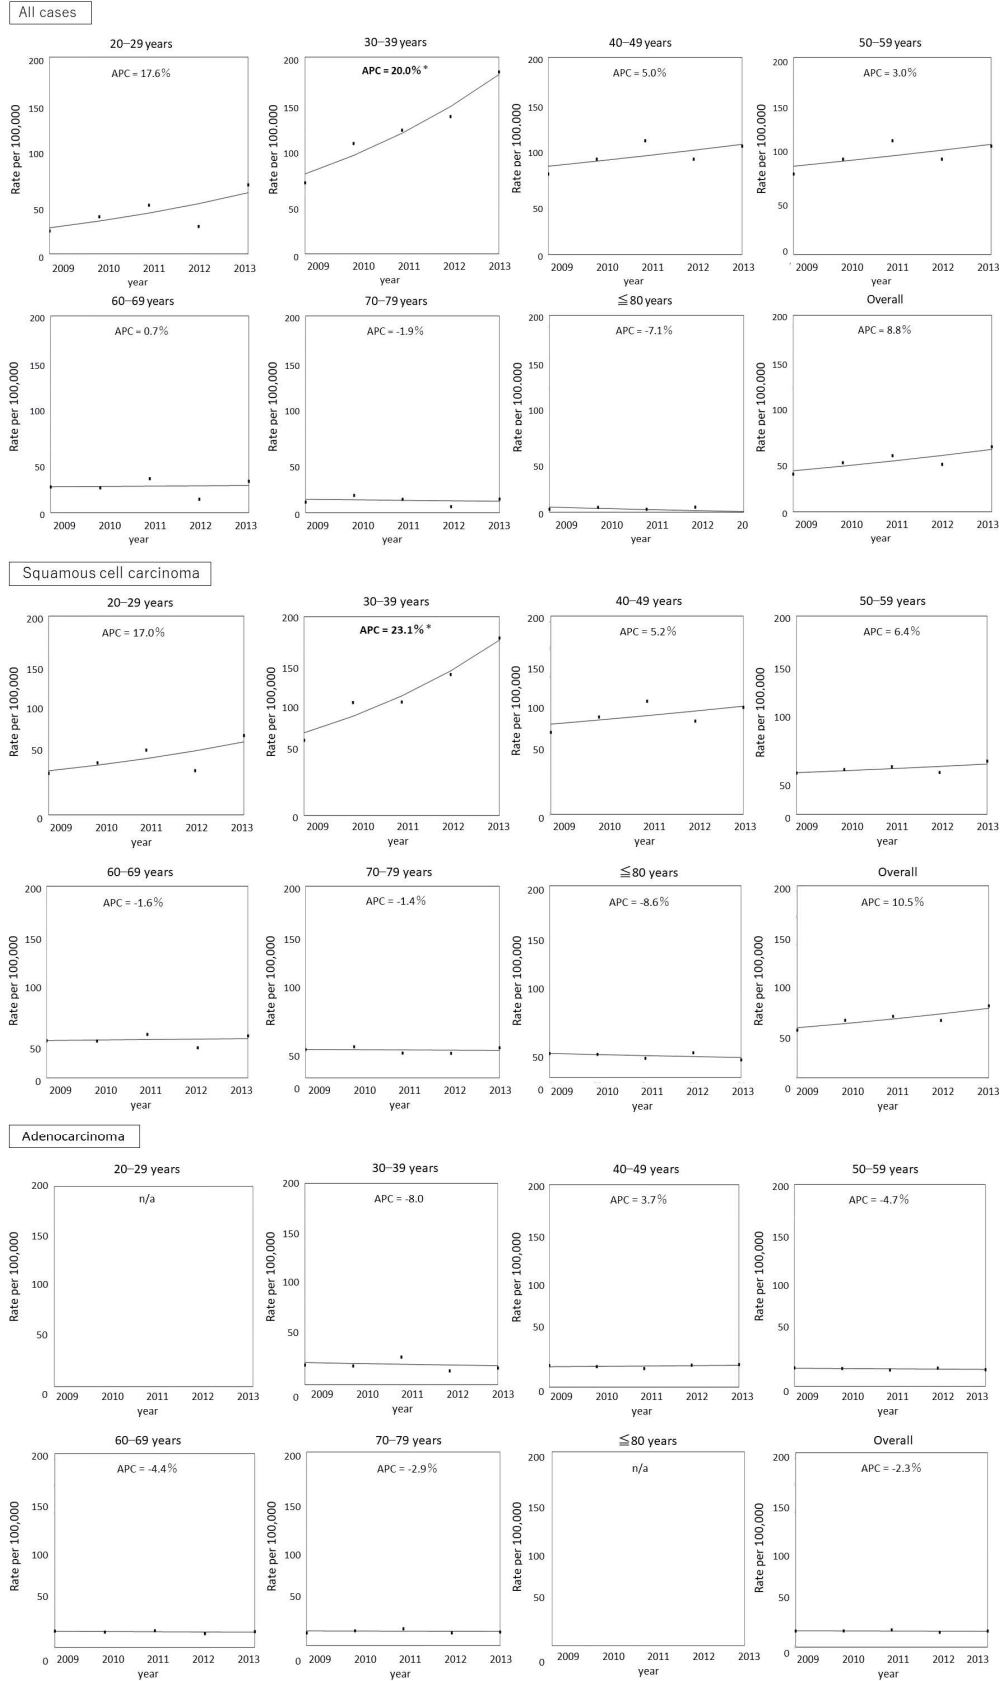

**Figure S1. Age-specific average annual percent change for cervical cancer incidence in Tochigi prefecture (2009–2013).** These figures were generated with the Joinpoint Regression Program (version 4.7.0.0) from the National Cancer Institute.
